# Supplementary material for: Naïve CD8+ T-Cells Engage a Versatile Metabolic Program Upon Activation in Humans and Differ Energetically From Memory CD8+ T-Cells
Source: PubMed Central journal article supplement (PMC6308131; doi:10.3389/fimmu.2018.02736), 2018-12-21
Supplement: Data_Sheet_2.pdf [file Data_Sheet_2.pdf]

**Table S1**

| <b>ANTIBODY</b> | <b>FLUOROCHROME</b> | <b>SUPPLIER AND REFERENCE</b> |
|-----------------|---------------------|-------------------------------|
| CCR7            | BV650               | BD BIOSCIENCES - 563407       |
| CCR7            | PE-Cy7              | BD BIOSCIENCES - 557648       |
| CD134           | BV711               | BD BIOSCIENCES - 563664       |
| CD27            | PE                  | BD BIOSCIENCES - 555441       |
| CD27            | AF700               | BIOLEGEND - 302814            |
| CD27            | BUV395              | BD BIOSCIENCES - 563815       |
| CD3             | BV605               | BD BIOSCIENCES - 563219       |
| CD38            | PC7                 | BECKMAN COULTER - A54189      |
| CD4             | APC-Cy7             | BD BIOSCIENCES - 557871       |
| CD4             | BUV395              | BD BIOSCIENCES - 563550       |
| CD4             | HV500               | BD BIOSCIENCES - 560768       |
| CD40L           | PE                  | BD BIOSCIENCES - 555700       |
| CD45RA          | ECD                 | BECKMAN COULTER - IM2711U     |
| CD45RA          | PerCP-Cy5.5         | E BIOSCIENCES - 45-0458-42    |
| CD45RA          | V450                | BD BIOSCIENCES - 560362       |
| CD49d           | PE-Cy7              | BIOLEGEND - 304314            |
| CD57            | Pacific Blue        | BIOLEGEND - 322316            |
| CD69            | FITC                | BD BIOSCIENCES - 347823       |
| CD8             | APC                 | BD BIOSCIENCES - 555369       |
| CD8             | APC-Cy7             | BD BIOSCIENCES - 557834       |
| CD8             | FITC                | BD BIOSCIENCES - 555366       |
| Granzyme B      | V450                | BD BIOSCIENCES - 561151       |
| HLADR           | PE-CF594            | BD BIOSCIENCES - 562304       |
| PD1             | APC                 | BIOLEGEND - 329908            |
| pS6             | Pacific Blue        | CELL SIGNALLING - 8520S       |
| Tbet            | eFluor660           | E BIOSCIENCES - 50-5825-80    |
