# Supplementary material for: Naïve CD8+ T-Cells Engage a Versatile Metabolic Program Upon Activation in Humans and Differ Energetically From Memory CD8+ T-Cells
Source: PubMed Central journal article supplement (PMC6308131; doi:10.3389/fimmu.2018.02736), 2018-12-21

Figure S1

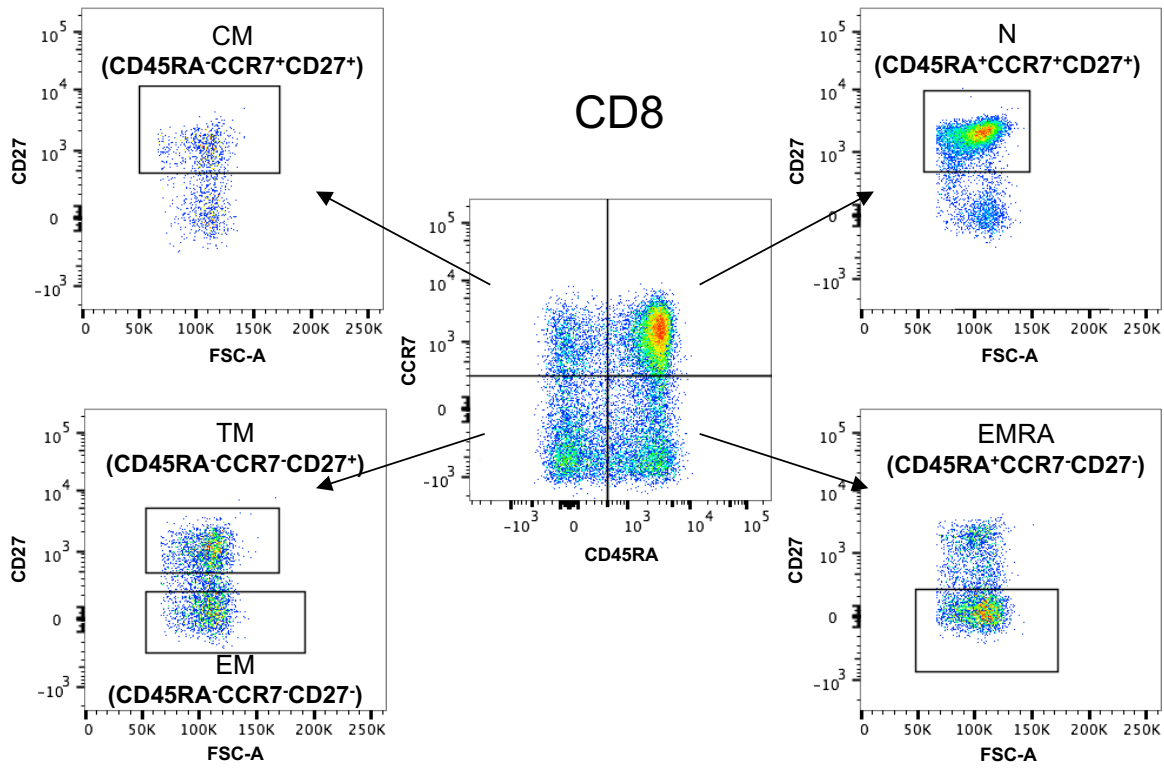

Figure S2

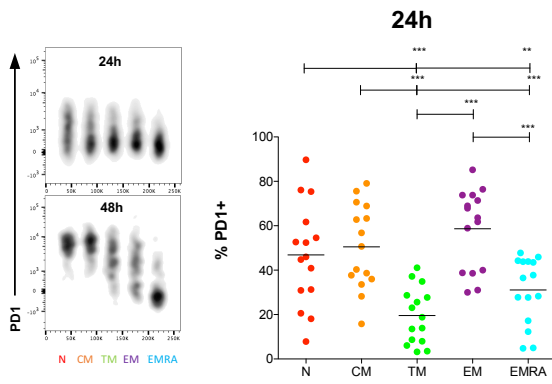

Figure S3

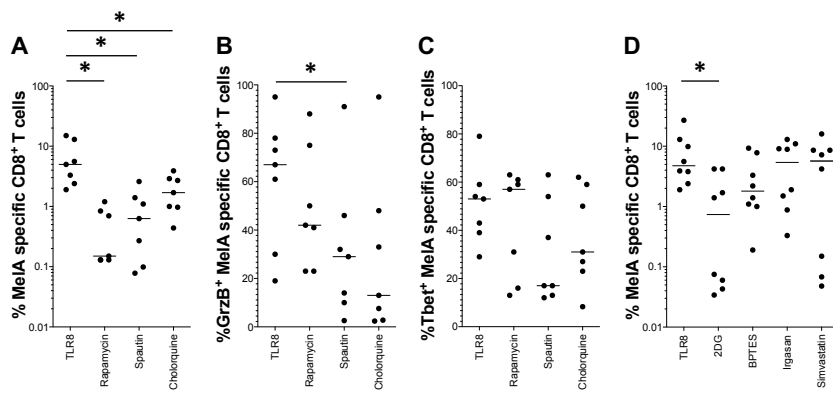

Supplement: Data_Sheet_3.pdf [file Data_Sheet_3.pdf]
